# Supplementary material for: TET2 is involved in DNA hydroxymethylation, cell proliferation and inflammatory response in keratinocytes
Source: PubMed Central journal article supplement — Mol Med Rep. 2020 Feb 18;21(4):1941–9. doi: 10.3892/mmr.2020.10989 (PMC7057829; doi:10.3892/mmr.2020.10989), 2020-02-18
Supplement: Supplementary_Data.pdf [file Supplementary_Data.pdf]

Table SI. Primers for reverse transcription-quantitative PCR.

| Gene                 | Sequence (5'→3')                                       |
|----------------------|--------------------------------------------------------|
| GAPDH                | F: GGCTCTCCAGAACATCATC<br>R: TCTTCCTCTTGTGCTCTTG       |
| TET2                 | F: TGATGCTGATGATGCTGATA<br>R: GTAGTGGTGGTGTCTCTTA      |
| P16 <sup>INK4A</sup> | F: ATATGCCTTCCCCCACTACC<br>R: CGTGAGTGCTCACTCCAGAA     |
| LCN2                 | F: CCACCTCAGACCTGATCCCA<br>R: CCCCTGGAATTGGTTGTCTTG    |
| S100A7               | F: ACGTGATGACAAGATTGACAAGC<br>R: GCGAGGTAATTTGTGCCCTTT |
| MMP9                 | F: AGACCTGGGCAGATTCCAAAC<br>R: CGGCAAGTCTTCCGAGTAGT    |
| CXCL1                | F: GAAAGCTTGCCTCAATCCTG<br>R: AACAGCCACCAGTGAGCTTC     |
| IRF7                 | F: GCTGGACGTGACCATCATGTA<br>R: GGGCCGTATAGGAACGTGC     |
| IL-7R                | F: CCCTCGTGGAGGTAAAGTGC<br>R: CCTTCCCGATAGACGACACTC    |

F, forward; R, reverse; TET2, ten-eleven translocation-2; P16<sup>INK4A</sup>, cyclin-dependent kinase inhibitor 2A; LCN2, lipocalin 2; S100A7, S100 calcium binding protein A7; MMP9, matrix metalloproteinase; CXCL1, C-X-C motif chemokine ligand 1; IRF7, interferon regulatory factor 7; IL-7R, interleukin-7 receptor.
